# Supplementary material for: Genomic characterization of the NAC transcription factors, directed at understanding their functions involved in endocarp lignification of iron walnut (Juglans sigillata Dode)
Source: Front Genet. 2023 May 9;14:1168142. doi: 10.3389/fgene.2023.1168142 (PMC10203416; doi:10.3389/fgene.2023.1168142)
Supplement: Supplementary file 1 [file Table2.XLSX]

## Sheet: Sheet1
Table S2 Analysis of physicochemical properties of 117 JsiNAC genes
Gene Name	Gene id	location			ORF(aa)	MV(Da)	pI	Aliphatic index	Protein hydrophobicity
JsiNAC1	OF05709	Chr01:7217882..7219430			407	45749.8	6.79	65.21	-0.495
JsiNAC2	OF05744	Chr01:7716960..7717436		7717436	123	14017.9	8.99	60.24	-0.642
JsiNAC3	OF06004	Chr01:10787250..10788431		10788431	255	28895.6	9.16	62.27	-0.722
JsiNAC4	OF06140	Chr01:12210533..12212436		12212436	287	33317.1	8.17	70.31	-0.632
JsiNAC5	OF06557	Chr01:16120074..16120976		16120976	192	21975.5	5.21	65.99	-0.736
JsiNAC6	OF06923	Chr01:19724450..19728409		19728409	472	54069.6	8.24	69.85	-0.681
JsiNAC7	OF07006	Chr01:21820064..21821762		21821762	297	34126.4	8.07	55.49	-0.737
JsiNAC8	OF20488	Chr01:46204075..46217285		46217285	540	59439.8	4.91	69.19	-0.349
JsiNAC9	OF20489	Chr01:46221441..46262635		46262635	527	58878.9	4.59	68.16	-0.444
JsiNAC10	OF20490	Chr01:46267283..46270462		46270462	485	53907.6	5.41	68.33	-0.544
JsiNAC11	OF20493	Chr01:46352584..46355798		46355798	565	62809.6	4.58	65.29	-0.551
JsiNAC12	OF29805	Chr02:7118058..7121743		7121743	466	52502.3	6.61	54.42	-0.979
JsiNAC13	OF30194	Chr02:12840287..12843730		12843730	295	33929.3	5.87	57.56	-0.645
JsiNAC14	OF26607	Chr02:17184519..17187274			311	36074.5	8.35	61.77	-0.757
JsiNAC15	OF08805	Chr02:22973519..22975940		22975940	289	32785.1	9.29	63.04	-0.815
JsiNAC16	OF08236	Chr02:34256966..34257628		34257628	170	19914.8	8.9	99.12	0.175
JsiNAC17	OF08222	Chr02:34420938..34424335		34424335	334	37388.8	4.77	71.86	-0.572
JsiNAC18	OF08203	Chr02:34731286..34732090		34732090	199	22945.9	5.08	72.46	-0.397
JsiNAC19	OF08173	Chr02:35244284..35245819			289	33193.5	6.02	61.8	-0.704
JsiNAC20	OF04615	Chr02:38123674..38126613			363	42207.2	6.34	67.38	-0.817
JsiNAC21	OF04785	Chr02:39976901..39981058			678	77391.7	5.46	64.32	-0.662
JsiNAC22	OF05075	Chr02:42646786..42650453			475	52921.6	6.68	71.24	-0.604
JsiNAC23	OF05247	Chr02:44176012..44177770			384	43109.7	6.2	68.62	-0.507
JsiNAC24	OF05279	Chr02:44414693..44415970			349	39511.1	6.43	52.81	-0.783
JsiNAC25	OF05399	Chr02:45585488..45590788			385	43683.7	6.76	55.71	-0.803
JsiNAC26	OF05452	Chr02:46016136..46017651			271	31314.7	9.44	74.06	-0.655
JsiNAC27	OF19705	Chr03:12660882..12662315		12662315	383	44394.7	6.09	66.45	-0.798
JsiNAC28	OF22586	Chr03:29908647..29910451		29910451	251	29173.6	5.48	66.85	-0.698
JsiNAC29	OF23428	Chr03:40496962..40499883			553	61922	4.64	71.61	-0.449
JsiNAC30	OF23429	Chr03:40507000..40510707			464	51884.9	5.84	68.53	-0.651
JsiNAC31	OF25054	Chr04:776386..777674		777674	250	28542.8	9.49	73.2	-0.469
JsiNAC32	OF25019	Chr04:1030397..1033074			364	41824.6	6.95	52.75	-0.977
JsiNAC33	OF24945	Chr04:1650231..1651509		1651509	349	39483.4	7.12	58.97	-0.687
JsiNAC34	OF24927	Chr04:1827520..1829203			395	44322.8	5.9	61.01	-0.591
JsiNAC35	OF24814	Chr04:2859211..2862905			394	44100.2	5.68	61.65	-0.734
JsiNAC36	OF24627	Chr04:4620013..4620013			680	77559.7	5.41	68.97	-0.646
JsiNAC37	OF24376	Chr04:7502298..7503455			290	33278.8	6.97	64.93	-0.669
JsiNAC38	OF24349	Chr04:7863990..7864877			190	22037.6	4.81	68.68	-0.505
JsiNAC39	OF24335	Chr04:7957264..7960713			311	36085.1	5.83	60.16	-0.858
JsiNAC40	OF24326	Chr04:8066822..8077635			474	52693	4.58	73.42	-0.417
JsiNAC41	OF23912	Chr04:16220278..16222192			281	31794.9	9.04	68.97	-0.731
JsiNAC42	OF04100	Chr04:32300029..32303244			292	33621.9	5.8	65.79	-0.621
JsiNAC43	OF21742	Chr05:9402733..9408577		9408577	388	44612.2	5.78	66.31	-0.675
JsiNAC44	OF16775	Chr05:24703207..24703689		24703689	160	18675.9	5.6	75.5	-0.649
JsiNAC45	OF17074	Chr05:28498790..28501064			373	41675	5.6	76.68	-0.391
JsiNAC46	OF17769	Chr05:35786112..35789722			369	41161.2	9.05	52.9	-0.801
JsiNAC47	OF29168	Chr06:2256436..2259194		2259194	219	25556.8	6.2	70.32	-0.498
JsiNAC48	OF29207	Chr06:3131938..3133196		3133196	357	40346.5	6.63	63.89	-0.625
JsiNAC49	OF21029	Chr06:11550898..11552610			327	37337.4	6.95	58.47	-0.856
JsiNAC50	OF28848	Chr06:22938312..22939182			103	12210.2	5.71	79.51	-0.483
JsiNAC51	OF02147	Chr06:26318762..26322368			809	90137.5	5.04	63.73	-0.722
JsiNAC52	OF02118	Chr06:26731828..26733510			421	47900.2	5.81	60.67	-0.77
JsiNAC53	OF01760	Chr06:31326398..31331627			421	48153.5	8.07	68.5	-0.497
JsiNAC54	OF01620	Chr06:32784650..32787112			366	40139	7.06	61.61	-0.464
JsiNAC55	OF01563	Chr06:33420656..33421884			336	38402	8.22	65.54	-0.701
JsiNAC56	OF01562	Chr06:33434101..33435499			365	40359.6	8.44	69.53	-0.575
JsiNAC57	OF25678	Chr07:6247013..6249093		6249093	340	38210.8	8.29	69.44	-0.608
JsiNAC58	OF25502	Chr07:9847647..9850579		9850579	247	28270.7	4.89	60.36	-0.687
JsiNAC59	OF30367	Chr07:11406944..11408657			310	35747.1	6.87	66.74	-0.795
JsiNAC60	OF01186	Chr07:14298016..14301134			367	41842.5	4.89	68.56	-0.708
JsiNAC61	OF00175	Chr07:21483962..21486475			237	27216.1	5.36	80.63	-0.55
JsiNAC62	OF00242	Chr07:23150475..23156356			456	51335.8	9.11	61.64	-0.62
JsiNAC63	OF18214	Chr07:26744825..26749719			354	39822.8	5.2	75.17	-0.445
JsiNAC64	OF25380	Chr07:30631288..30632692			291	33330.8	6.46	59.38	-0.738
JsiNAC65	OF25187	Chr07:33650311..33656620			539	61327.8	4.77	64.97	-0.739
JsiNAC66	OF25128	Chr07:34471648..34476022			432	48663.2	4.95	66.32	-0.803
JsiNAC67	OF28925	Chr08:16424087..16425349			342	38934.1	7.56	74.97	-0.581
JsiNAC68	OF29033	Chr08:19714126..19715129		19715129	233	26902.6	5.63	80.3	-0.512
JsiNAC69	OF15397	Chr08:23490876..23492345		23492345	388	43683.1	6.15	63.32	-0.655
JsiNAC70	OF15487	Chr08:24384810..24386773			269	30768.1	6.08	55.43	-0.871
JsiNAC71	OF15676	Chr08:26237107..26238732			301	33956.3	4.84	58.37	-0.732
JsiNAC72	OF15858	Chr08:28150588..28154298			365	41351.6	7.71	67.01	-0.882
JsiNAC73	OF26810	Chr09:5691582..5692989		5692989	377	43076.2	6.23	57.93	-0.758
JsiNAC74	OF15337	Chr09:11966003..11966883		11966883	190	21682.8	4.86	88.79	-0.219
JsiNAC75	OF15207	Chr09:15362205..15363399			306	35148.5	7.64	59.22	-0.79
JsiNAC76	OF14452	Chr09:26876017..26878722			303	34235.4	6.71	69.8	-0.755
JsiNAC77	OF14366	Chr09:27734386..27735689			347	38130.6	8.41	66.4	-0.665
JsiNAC78	OF14015	Chr09:31438694..31440855			264	30255.7	6.61	55.38	-0.892
JsiNAC79	OF13860	Chr09:32881263..32882820			395	44262.1	6.72	70.08	-0.533
JsiNAC80	OF12101	Chr10:6509529..6520836		6520836	1264	139880	4.78	69.37	-0.524
JsiNAC81	OF12100	Chr10:6537137..6539445		6539445	484	53774.3	4.61	66.12	-0.651
JsiNAC82	OF11669	Chr10:20905792..20907282			406	45751.7	6.51	66.26	-0.514
JsiNAC83	OF11646	Chr10:21192163..21193221			280	32250.3	8.22	60.18	-0.747
JsiNAC84	OF11476	Chr10:23674512..23675723			257	28901.8	9.5	64.09	-0.643
JsiNAC85	OF11374	Chr10:24700643..24702294			312	36090.3	6.28	73.17	-0.534
JsiNAC86	OF07878	Chr11:8562565..8564104		8564104	416	46900	5.66	66.3	-0.706
JsiNAC87	OF07859	Chr11:9000804..9008316		9008316	299	34590	5.86	73.65	-0.63
JsiNAC88	OF12759	Chr11:28353694..28363692		28363692	1084	121889	5.04	68.66	-0.651
JsiNAC89	OF27053	Chr12:3137663..3139344		3139344	332	38295.8	5.71	67.53	-0.805
JsiNAC90	OF27056	Chr12:3190054..3191755		3191755	347	39327.3	4.55	60.75	-0.751
JsiNAC91	OF27274	Chr12:7186291..7187282			246	27997.5	5.6	67.76	-0.567
JsiNAC92	OF27285	Chr12:7445963..7458636			397	44911.3	5.03	73.45	-0.535
JsiNAC93	OF27389	Chr12:10915267..10916970			358	40503	4.9	64.05	-0.688
JsiNAC94	OF27560	Chr12:16624253..16626177			339	38742.6	8.64	60.09	-0.835
JsiNAC95	OF09107	Chr13:2451084..2452391		2452391	362	39921	8.79	65.22	-0.648
JsiNAC96	OF09108	Chr13:2462342..2463647		2463647	353	40195.1	6.84	65.98	-0.655
JsiNAC97	OF09146	Chr13:2833208..2835418			359	39402.3	7	62.31	-0.413
JsiNAC98	OF09249	Chr13:3853089..3855516			386	45148.1	6.44	56.84	-0.898
JsiNAC99	OF09513	Chr13:6519367..6521082			417	47564.7	5.49	65.23	-0.756
JsiNAC100	OF09654	Chr13:7998732..8000589			344	39070.8	5.37	59.22	-0.622
JsiNAC101	OF10111	Chr13:18714932..18716162			356	40233.4	7.65	66.26	-0.553
JsiNAC102	OF10133	Chr13:19874763..19879936			304	34292.8	6.66	66.38	-0.529
JsiNAC103	OF10216	Chr13:19879936..23859716			236	26707.9	8.31	58.6	-0.72
JsiNAC104	OF02793	Chr14:2133906..2136725		2136725	376	41577.8	9.25	55.51	-0.766
JsiNAC105	OF02481	Chr14:8089744..8091975		8091975	367	41308.9	8.44	70.49	-0.427
JsiNAC106	OF01042	Chr14:18669525..18671729			341	39273	5.04	65.48	-0.719
JsiNAC107	OF00645	Chr15:2181386..2182985		2182985	325	37225	8.37	60.03	-0.713
JsiNAC108	OF00675	Chr15:3860439..3873622		3873622	596	66499.2	5.36	65.64	-0.674
JsiNAC109	OF00808	Chr15:6476003..6479134			258	29860.4	5.67	54.42	-0.826
JsiNAC110	OF03231	Chr15:11595863..11598103			338	38626.1	5.75	69.56	-0.67
JsiNAC111	OF03394	Chr15:14962342..14965903			307	34392.8	6.13	73.71	-0.439
JsiNAC112	OF03515	Chr15:16804464..16805659			285	32416.7	8.14	61.96	-0.666
JsiNAC113	OF03695	Chr15:19048927..19053050			565	63480.8	4.99	75.73	-0.579
JsiNAC114	OF16273	Chr16:5536854..5537827		5537827	243	27713.3	6.46	63.7	-0.571
JsiNAC115	OF16262	Chr16:5916260..5921398		5921398	399	44594.5	8.9	75.04	-0.592
JsiNAC116	OF18790	Scaffold268:6977..8935		8935	336	38911.6	5.07	62.68	-0.792
JsiNAC117	OF10702	Scaffold538:518930..520176		520176	243	27413.9	9.28	62.55	-0.566
