# Supplementary material for: Genomic characterization of the NAC transcription factors, directed at understanding their functions involved in endocarp lignification of iron walnut (Juglans sigillata Dode)
Source: Front Genet. 2023 May 9;14:1168142. doi: 10.3389/fgene.2023.1168142 (PMC10203416; doi:10.3389/fgene.2023.1168142)
Supplement: Supplementary file 3 [file Table3.XLSX]

## Sheet: Sheet1
Table S3 The sequence information for each motif
Motif	Motif Consensus
1	TGEKEWYFFSPRDRKYPNGTRTNRATGAGYWKATGKDKPIY
2	LPPGFRFHPTDEELVGYYLKRKVSG
3	PKGEKTBWVMHEYRL
4	LIGMKKTLVFYRGRA
5	IPEVDLYKCEPWDLP
6	AQDEWVLCRVFKKSG
7	PAGVKFDPSDQEJLEHLEAKVGSDTRKLHPLIDEFIPTJEGEBGICYTHP
8	PGVSKDGQSRHFFHRPSKAYTTGTRKRRKVHTDHDGSETRW
9	VTDWRALDKLVASQLSSQ
10	PGPKNGEQYGAPFKEEEWNDD
11	SLKLPPGFRFHPTDZELIVYYLKRKVNSK
12	HQHDRFLQLPQLESPSLPLLPRPSSIS
13	ECDQNSYNAYTAKNQVAEATASEGDLQSEEGLAMSDLSPEPIDWNLPFP
14	FEGDGESSFGAHHNSDLALLLLQSSRDEEGKLNGFLNSSSDDCDIGICIF
15	EGWDTSYFYEEPTGVSSVVDPIEFISRQPPNFLAQNLMCKQEIESDNLSF
