# Supplementary material for: Genomic characterization of the NAC transcription factors, directed at understanding their functions involved in endocarp lignification of iron walnut (Juglans sigillata Dode)
Source: Front Genet. 2023 May 9;14:1168142. doi: 10.3389/fgene.2023.1168142 (PMC10203416; doi:10.3389/fgene.2023.1168142)
Supplement: Supplementary file 4 [file DataSheet3.docx]

Supplementary Material

**Genomic Characterization of the NAC Transcription Factors, Directed at Understanding Their Functions Involved in Endocarp Lignification of Iron Walnut (*Juglans sigillata* Dode)**

**Anmin Yu1†, Hanyu Zou1†, Ping Li1,** **Xiaowei** **Yao1, Zekun Zhou1, Xu Gu1, Rui Sun****1****, Aizhong Liu1***

*** Correspondence:** Aizhong Liu: liuaizhong@mail.kib.ac.cn

**Supplementary Figure**
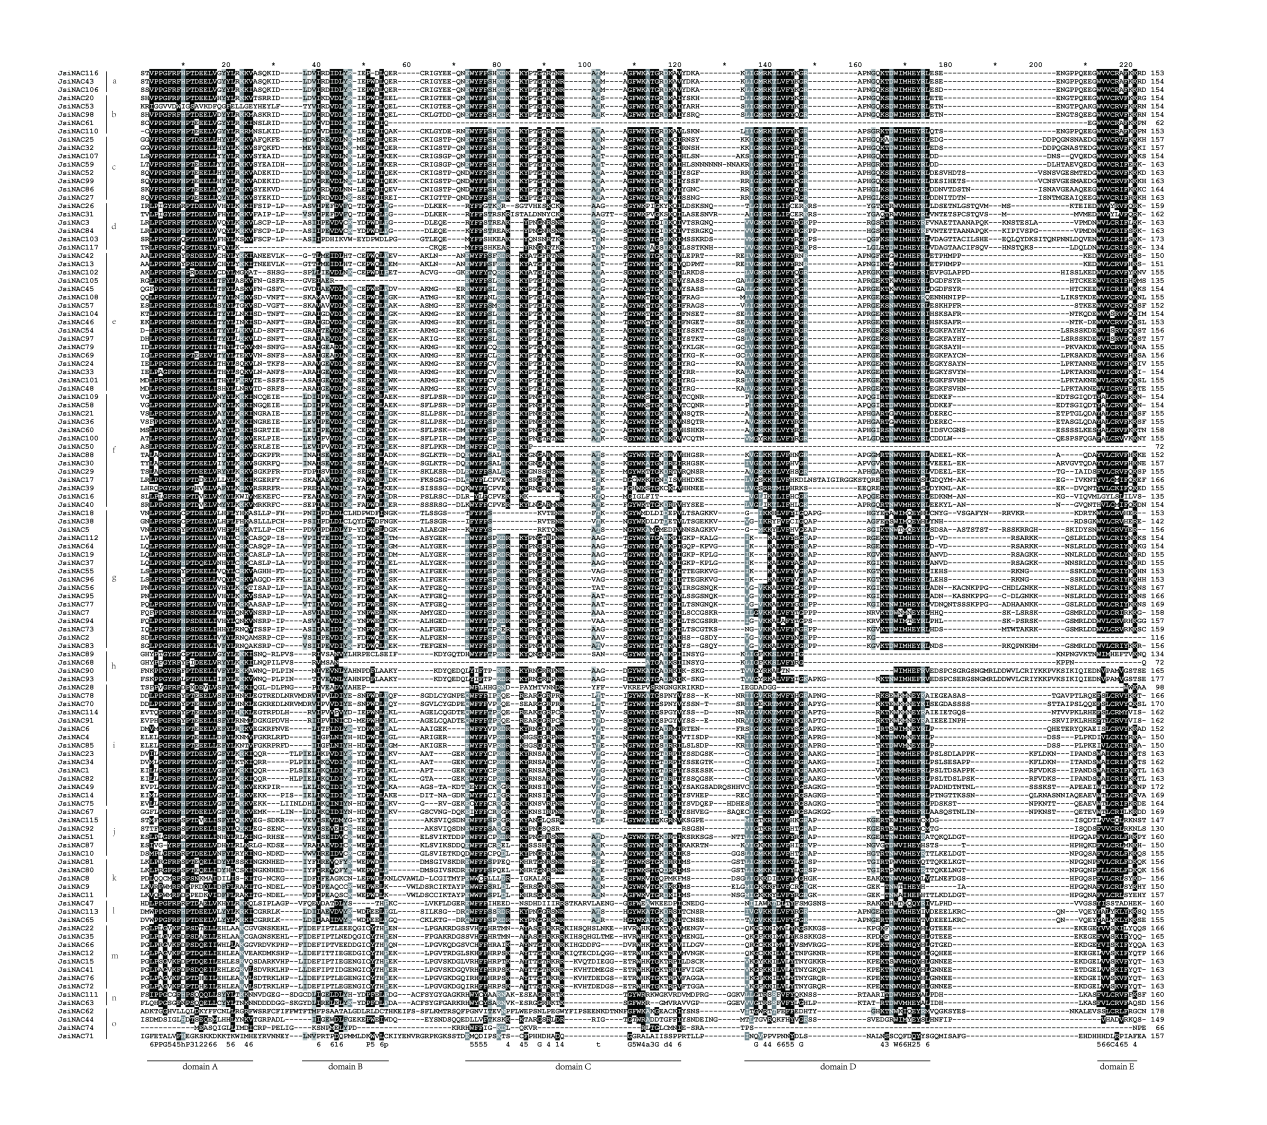
**3.** **Sequence alignment of 117 *JsiNAC* proteins.** Comparison of amino acid sequences of the NAC structural domains. Five conserved structural domains (A-E) were identified.
