# Supplementary material for: Genomic characterization of the NAC transcription factors, directed at understanding their functions involved in endocarp lignification of iron walnut (Juglans sigillata Dode)
Source: Front Genet. 2023 May 9;14:1168142. doi: 10.3389/fgene.2023.1168142 (PMC10203416; doi:10.3389/fgene.2023.1168142)
Supplement: Supplementary file 5 [file Table6.XLSX]

## Sheet: Sheet1
Table S6 Correlation analysis the expression pattern of 12 candidate genes between qRT-PCR and RNA-Seq.
gene_id	qRT-PCR			RNA-seq			R(correlation)
	T1	T2	T3	P1	P2	P3
JsiNAC3	1.92	1.34	2.76	70.18	118.48	107.08	0.12
JsiNAC29	3.05	1.07	0.62	59.26	22.97	27.33	0.96
JsiNAC33	0.13	0.23	0.62	9.43	62.56	77.75	0.8
JsiNAC42	3.29	33.44	166.19	15.51	127.2	190.55	0.87
JsiNAC55	0.2	0.6	0.75	49.64	41.58	140.44	0.66
JsiNAC56	30.77	104.93	211.33	5.01	47.32	122.25	1
JsiNAC62	0.8	0.75	0.59	54.44	34.31	38.61	0.52
JsiNAC77	3.32	998.3	35.1	3.19	47.48	81.25	0.11
JsiNAC83	0.24	6.57	3.36	40.93	17.96	63.28	-0.51
JsiNAC95	19.93	17.43	10.58	60.55	66.35	63.81	-0.33
JsiNAC96	0.92	3.96	8.09	32.36	14.77	81.77	0.77
JsiNAC99	749.61	19.93	111.95	37.84	41.43	43.76	-0.87
