# Supplementary material for: Genomic characterization of the NAC transcription factors, directed at understanding their functions involved in endocarp lignification of iron walnut (Juglans sigillata Dode)
Source: Front Genet. 2023 May 9;14:1168142. doi: 10.3389/fgene.2023.1168142 (PMC10203416; doi:10.3389/fgene.2023.1168142)
Supplement: Supplementary file 6 [file Table4.XLSX]

## Sheet: Sheet1
Table S4 Expression of JsiNAC genes in different tissues of iron walnut
gene name	bud	root	fruit	immature endocarp	mature endocarp	xylem region
JsiNAC1	0	0.36	0	0	0	0
JsiNAC2	6.99	4.55	0	0	5.7	8.49
JsiNAC3	85.35	176.14	120.68	164.59	185.66	876.34
JsiNAC4	9.45	18.49	1.97	2.22	0.98	0.12
JsiNAC5	3.01	0.71	0.84	0.73	2.24	1.64
JsiNAC6	2.04	3.84	0.43	0.05	0	0
JsiNAC7	0	0	0	0	0	0
JsiNAC8	0.15	0.19	0.16	0.18	0.12	0
JsiNAC9	0.07	0.03	0.03	0.03	0	0
JsiNAC10	5.38	4.75	5.47	8.61	5.77	9.31
JsiNAC11	2.18	2.28	4.34	7.92	2.13	0
JsiNAC12	2.95	8.44	1.92	2.7	4.21	3.78
JsiNAC13	0.41	1	0.33	0.74	0.45	0.63
JsiNAC14	0	0.15	0	0	0	0
JsiNAC15	0.07	5.48	1.12	1.13	1.73	0
JsiNAC16	0.66	0	0	0.28	0	1.65
JsiNAC17	3.15	3.43	4.52	4.58	12.89	3.85
JsiNAC18	4.58	0.6	0	0	0	0
JsiNAC19	42.72	209.96	37.28	5.78	176.7	49.96
JsiNAC20	0.24	2.54	0.17	0.3	0	0.42
JsiNAC21	0.36	0.27	0.17	0.2	0.32	0
JsiNAC22	1.15	0.75	0.68	0.33	0.19	0
JsiNAC23	0	3.02	0	0	0	3.45
JsiNAC24	7.76	32.9	17.18	41.17	42.61	46.15
JsiNAC25	0	0.08	0	0	0	0
JsiNAC26	3.18	3.82	6.33	0.96	12.2	0
JsiNAC27	0	0.22	4.07	1.08	0	0
JsiNAC28	0	0	0	0	0	0
JsiNAC29	7.18	26.71	6.94	7.04	17.07	7.23
JsiNAC30	1.77	3.25	2.47	2.85	5.17	4.83
JsiNAC31	0	0	0	0	0	0
JsiNAC32	0	0.93	0	0	0	0
JsiNAC33	2.95	4.71	4	12.01	78.71	17.18
JsiNAC34	0	0	0.42	1.06	0	0
JsiNAC35	2.14	2.41	0.86	1.31	0.36	0.19
JsiNAC36	0.5	0	0.2	0.57	0.65	0
JsiNAC37	0.98	10.41	2.73	0.69	6.64	0
JsiNAC38	7.11	0.91	4.85	0.79	0	0
JsiNAC39	0.89	1.05	1.42	1.96	1.55	1.56
JsiNAC40	2.08	0.85	2.08	2.82	3.23	5.93
JsiNAC41	0	1.76	0.85	0.32	0	0
JsiNAC42	0.25	1.27	6.2	16.62	42.78	8.55
JsiNAC43	0.95	0.12	0.62	0.38	0.48	0
JsiNAC44	0	0	0	0	0	0
JsiNAC45	5.94	0	0	0	0.1	0
JsiNAC46	0	18.1	0	0	0.04	2.87
JsiNAC47	0	0	0	0	0	0
JsiNAC48	1.32	18.26	4.46	6.34	13.33	27.04
JsiNAC49	0	2.67	0	0.11	0.59	9.69
JsiNAC50	2.42	1.48	4	4.26	3.12	0
JsiNAC51	27.73	27.05	44.29	47.49	57.52	167.83
JsiNAC52	4.17	19.01	15.54	6.45	18.74	98.1
JsiNAC53	0.7	0.28	0.36	1.07	0.09	0
JsiNAC54	0.57	0	0	0	0	0
JsiNAC55	44.76	35.32	8.42	4.17	389.04	163.56
JsiNAC56	1.38	11.95	33.03	53.73	479.08	96.9
JsiNAC57	0.21	4.52	0	0	0	4.61
JsiNAC58	0.48	0.27	0.17	0.26	0	0
JsiNAC59	0	0	0	0	0	0
JsiNAC60	0	0	0.24	0.21	0	0
JsiNAC61	0.45	0.29	0.09	0.24	13.26	0
JsiNAC62	5.71	11.22	10.17	9.52	14.71	8
JsiNAC63	0.91	0.82	1.28	1.24	2	0.64
JsiNAC64	2.19	22.26	2.17	2.61	14.71	20.3
JsiNAC65	8.58	11.99	10.07	11.79	17.59	7.47
JsiNAC66	6.64	2.61	3.28	3.88	2.5	7.96
JsiNAC67	0.21	0.19	0	0	0	0
JsiNAC68	0	0	0	0	0	0
JsiNAC69	7.34	20.94	0.59	0.96	0.42	24.54
JsiNAC70	0.18	0	0.5	0	0	0
JsiNAC71	0	0	0	0	0	0
JsiNAC72	1.09	7.13	2.98	1.28	9	2.65
JsiNAC73	0.31	0	0	0	0	0
JsiNAC74	1.39	0.27	1.24	1.12	0.97	0
JsiNAC75	0	0	0	0	0	0
JsiNAC76	0.62	2.88	0.81	0.38	0.83	0.17
JsiNAC77	0	22.62	3.76	10.48	38.19	359.33
JsiNAC78	0.28	0.3	0	0	0	0
JsiNAC79	0.17	7.95	0.49	0.15	0.75	4.85
JsiNAC80	11.78	21.65	9.8	8.41	14.22	8.81
JsiNAC81	0.42	0.24	1.44	1.06	0.4	0
JsiNAC82	0	0	0	0	0	0
JsiNAC83	39.52	9.72	3.91	3.02	112.52	40.1
JsiNAC84	18.53	224.37	31.06	40.27	45.25	57.34
JsiNAC85	3.82	13.53	1.55	1.05	2.02	0.19
JsiNAC86	0.8	7.67	5.09	1.89	0	20.74
JsiNAC87	0.47	0.37	0.99	0.37	1.01	0.12
JsiNAC88	5.37	4.64	4.45	4.36	8.32	8.32
JsiNAC89	0	0	0	0	0	0
JsiNAC90	0.15	0.33	0.51	0.72	0.18	0
JsiNAC91	0	2.76	0.77	0.57	0	0
JsiNAC92	0.3	0.78	0.25	0.39	0.72	0.98
JsiNAC93	0.15	0.24	0.29	0.22	0	0
JsiNAC94	0	0.13	0	0	0	0.16
JsiNAC95	1.27	11.68	81.14	113.71	143.72	97.15
JsiNAC96	10.48	45.92	2.29	5.58	35.63	663.86
JsiNAC97	1.39	0.29	0	0.08	0	0
JsiNAC98	0.36	0.13	0.29	0.99	0.26	0
JsiNAC99	1.94	5.2	25.56	23.43	0	0.27
JsiNAC100	0.8	5.58	0.91	2.02	1.25	0.59
JsiNAC101	2.57	16.72	4.47	3.4	23.85	25.57
JsiNAC102	1.48	4.51	0.04	0	3.96	0
JsiNAC103	0.8	0.54	2.17	3.27	0.26	0
JsiNAC104	0	2.31	0.04	0	0.06	5.14
JsiNAC105	1.18	0	0.07	0.13	0	0
JsiNAC106	0.4	2.41	0.64	0.85	0.85	0
JsiNAC107	0	2.21	0	0	0	0
JsiNAC108	0.86	2.04	1.51	1.29	4.54	4.85
JsiNAC109	0.11	0	0.19	0.21	0	0
JsiNAC110	0.31	0.54	0.22	0.61	0.21	0
JsiNAC111	0.57	0.77	0.57	0.67	1.53	1.2
JsiNAC112	3.37	26.62	16.99	0.59	5.85	2.02
JsiNAC113	15.15	45.36	17.36	17.06	22.13	50.46
JsiNAC114	4.68	1.57	1.85	0	0	0
JsiNAC115	1.18	11.37	10.81	9.47	3.69	7.23
JsiNAC116	0.99	0.45	0.11	0.67	0.4	0
JsiNAC117	0	0	0.87	0.53	0	0
