# Supplementary material for: Genomic characterization of the NAC transcription factors, directed at understanding their functions involved in endocarp lignification of iron walnut (Juglans sigillata Dode)
Source: Front Genet. 2023 May 9;14:1168142. doi: 10.3389/fgene.2023.1168142 (PMC10203416; doi:10.3389/fgene.2023.1168142)
Supplement: Supplementary file 7 [file Table1.XLSX]

## Sheet: Sheet1
Table S1 qPCR primer sequences of J. sigillata
gene name	Forward primer (F)	Reverse primer (R)
JsiNAC3	AGGCCACTGGAATCGACAAG	ACATGGCCAATGCTGGTAGT
JsiNAC29	AAACCCGGTCGAGTCAGATG	CTCTGACGGCTGTTGACCAT
JsiNAC33	ACCGATGTTGGTGAGACGAC	GTCGGTTACCGCCGAAGATA
JsiNAC42	TGAACACTCACGTTCACGCA	CACTAGGTGAGACAGCCTGC
JsiNAC55	TCATGCACGAGTATCGCCTC	CTCCAACACGTCGTCCAAGT
JsiNAC56	TACCGGCTTGCCGATAACAA	TGGGTCCAATCATGTCAGCC
JsiNAC62	TCTGTTTGTGGAGTTGGCGT	GATGACATGCTCGTGCAACC
JsiNAC77	GCTGATCATGCCGCAAACAA	TTCAAGTGCTGCGTCGTAGT
JsiNAC83	TGTCAAGGTTTCCGAGGACC	TTCACAACCATTGGCTGGCT
JsiNAC95	GCCTGTTCAAGTTCCAAGCG	AGACGTTGACGCATTCCCAT
JsiNAC96	CGCCTCCTAGAACACTCACG	GCAAATCGAAGAAGCGGTCG
JsiNAC99	TCAATGGCGGAAGACGGATG	GTTGTTGCCGCATGATTCGT
