# Supplementary material for: Genomic characterization of the NAC transcription factors, directed at understanding their functions involved in endocarp lignification of iron walnut (Juglans sigillata Dode)
Source: Front Genet. 2023 May 9;14:1168142. doi: 10.3389/fgene.2023.1168142 (PMC10203416; doi:10.3389/fgene.2023.1168142)
Supplement: Supplementary file 9 [file Table5.XLSX]

## Sheet: Sheet1
Table S5 Expression of JsiNAC genes at three different development stages of iron walnut endocarp.
gene name	P1	P2	P3
JsiNAC79	0.369638	0.346686	0.573275
JsiNAC34	0.102751	1.4568	0.0866951
JsiNAC100	0.727296	0.949607	0.546118
JsiNAC12	1.33448	0.668294	1.05826
JsiNAC27	0	1.79274	1.26982
JsiNAC16	0.906658	1.27332	1.2955
JsiNAC5	2.60394	0.293381	0.741282
JsiNAC50	2.60769	0.808387	1.33661
JsiNAC9	5.45629	0.250247	0.249796
JsiNAC18	0.682909	2.19461	3.24329
JsiNAC108	1.91825	2.66863	2.18818
JsiNAC81	5.9076	1.385	0.554908
JsiNAC41	0.18579	2.79752	5.28252
JsiNAC26	1.52713	2.81283	4.30846
JsiNAC8	5.4629	1.7822	1.61503
JsiNAC69	5.89454	2.62973	1.94525
JsiNAC86	0.073877	4.52112	8.4922
JsiNAC87	7.30495	4.2536	4.06555
JsiNAC15	0.805728	5.97497	8.92305
JsiNAC38	17.8861	0.36741	0.422553
JsiNAC11	16.8662	1.08438	1.41463
JsiNAC72	1.38674	4.59272	15.6126
JsiNAC63	8.01284	8.34013	6.89329
JsiNAC92	10.8423	5.037	8.25006
JsiNAC102	0.278829	13.0196	13.2003
JsiNAC64	7.19114	9.68239	11.6248
JsiNAC2	14.6962	2.49451	12.5656
JsiNAC76	1.96936	2.45441	26.4144
JsiNAC13	3.6494	9.11008	19.3131
JsiNAC40	11.5129	13.9528	12.6986
JsiNAC10	17.421	9.67606	15.1522
JsiNAC66	8.36508	25.6506	15.3141
JsiNAC17	16.2051	23.8121	11.4871
JsiNAC111	29.7648	13.3997	10.8267
JsiNAC39	23.7024	20.4842	13.3606
JsiNAC65	24.8771	26.38	15.9054
JsiNAC101	0.960517	41.3389	27.637
JsiNAC112	21.1364	24.4198	36.6144
JsiNAC52	1.59256	21.3273	61.7115
JsiNAC80	44.6345	25.1566	16.7295
JsiNAC19	53.6677	11.8682	21.0569
JsiNAC30	41.8865	24.3089	24.0508
JsiNAC24	8.21455	44.4748	53.0793
JsiNAC29	59.2565	22.9725	27.3305
JsiNAC51	44.5811	30.5354	36.5796
JsiNAC88	46.2638	28.7421	40.7193
JsiNAC83	40.9316	17.961	63.2803
JsiNAC99	37.8424	41.4316	43.7581
JsiNAC62	54.4372	34.3109	38.6079
JsiNAC96	32.3558	14.7745	81.7682
JsiNAC77	3.18623	47.4838	81.2513
JsiNAC37	114.621	4.77493	14.401
JsiNAC115	50.9253	42.2461	54.867
JsiNAC33	9.42522	62.5588	77.7488
JsiNAC113	58.7423	40.6368	58.9457
JsiNAC48	24.1473	74.4046	70.8414
JsiNAC56	5.01025	47.3153	122.248
JsiNAC95	60.5476	66.3481	63.8073
JsiNAC55	49.6385	41.5796	140.439
JsiNAC3	70.1805	118.479	107.077
JsiNAC42	15.5106	127.2	190.547
JsiNAC84	72.1958	88.9612	178.921
